# Supplementary material for: Photoinduced charge transfer in ZnO/Cu2O heterostructure films studied by surface photovoltage technique
Source: Royal Society of Chemistry journal article supplement (doi:10.1039/c0cp01228a), 2010-01-01
Supplement: c0cp01228a.pdf [file c0cp01228a.pdf]

Supplementary Information:

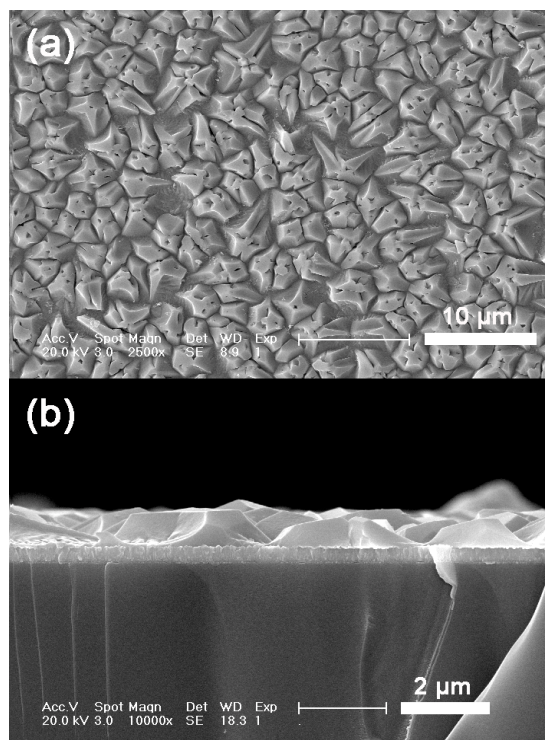

**Fig. S1:** SEM images of Cu<sub>2</sub>O film. (a) Top view image of Cu<sub>2</sub>O film; (b) cross section image of Cu<sub>2</sub>O film.

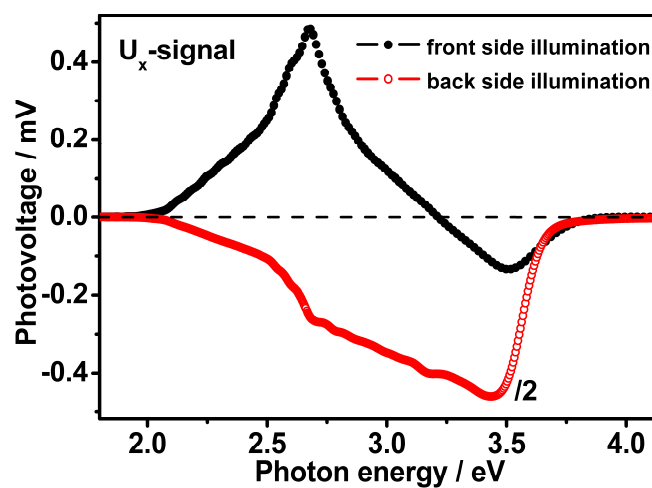

**Fig. S2:** SPV spectra of ZnO/Cu<sub>2</sub>O heterostructure film under front and back side illumination measured by lock-in amplifier as the in-phase photovoltage signals [ $U_x$ ,  $U_x = U \times \cos(\text{phase})$ ].

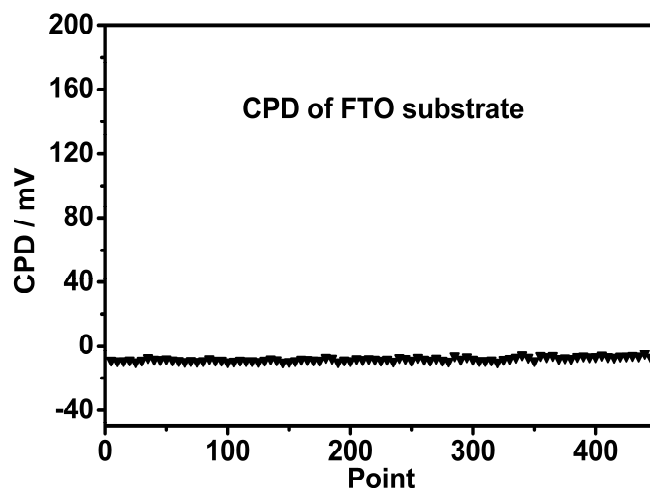

**Fig. S3:** CPD of FTO substrate.

In our experiment we measured the surface work functions instead of bulk work functions. For an n-type semiconductor (ZnO for instance) with upward band bending, the measured surface work function is larger than its bulk work function while lower for a p-type semiconductor (Cu<sub>2</sub>O for instance). So when taking into account the surface band bending the interfacial electric field magnitude is larger than the difference of the measured CPDs (0.19 V). The Fermi levels of ZnO and Cu<sub>2</sub>O under vacuum condition are necessary to confirm the interfacial electric field magnitude. However the measurement of the Fermi levels of ZnO and Cu<sub>2</sub>O under vacuum condition is extremely difficult. Here we just make a rough estimate. The measurement of surface work functions was taken under the same atmosphere so we neglect the influence of adsorbates.
